# Supplementary material for: An improved assembly and annotation of the allohexaploid wheat genome identifies complete families of agronomic genes and provides genomic evidence for chromosomal translocations
Source: Genome Res. 2017 May;27(5):885–96. doi: 10.1101/gr.217117.116 (PMC5411782; doi:10.1101/gr.217117.116)
Supplement: Supplemental Material [file supp_gr.217117.116_Supplemental_File_S7.xlsx]

## Sheet: Raw
type	transl	gene	desc	group	start	stop	strand	chr	cM	fw	check1	rev	check2	check3	fragment_length
known	4AL_5AL	TRIAE_CS42_5AL_TGACv1_375821_AA1227550.1:group17899:46367:51595	NADH-ubiquinone_oxidoreductase_B18_subunit,_Uncharacterized_protein	group17899	46367	51595	-	5A	82.2857	GTTGATGTAGTAGTGCCTCTGTTAT	PASS	TGGCCACGATAACCTCACAA	PASS	1	78	memo: since frag size is small, we need to ask to run 3% agarose gel, 50 bp ladder and additional no template control to distinguish primer-dimers from PCR product.
known	4AL_5AL	TRIAE_CS42_5AL_TGACv1_375102_AA1216090.1:group17588:72632:76155	UDP-galactose_transporter_2	group17588	72632	76155	-	5A	94.846	GATGGAGATGATCACAGATGGATTA	PASS	ACGGAGACCTAAGGCAAAAGG	PASS	1	57
known	7BS_4AL	TRIAE_CS42_4AL_TGACv1_288159_AA0938900.2:group1175:29540:34615	WRKY_transcription_factor_73	group1175	29540	34615	-	4A	111.179	ACAACCACGTTTGCTATTAGCT	PASS	TCACACCCTAAATACGCCCA	PASS	1	58
novel	5BL_4BS	TRIAE_CS42_4BS_TGACv1_328754_AA1093140.1:group17187:56413:57306	Acetyltransferase,_GNAT_family_protein,_expressed,_protein,_Putative_acetyltransferase	group17187	56413	57306	-	4B	50.376	GGATACCATGTGCAATGTACGTAG	PASS	GGATCGGAGAAAGGGAGTAGT	PASS	1	101
novel	7AL_3AL	TRIAE_CS42_3AL_TGACv1_193998_AA0624240.1:group12953:15776:19955	Pre-mRNA-splicing_factor_SLU7	group12953	15776	19955	-	3A	70.7247	CGATAATGCTCGTATGCGGAATTAT	PASS	ACTCTCATATTCCCACCCACA	PASS	1	67
known	4AL_5AL	TRIAE_CS42_5AL_TGACv1_373985_AA1186550.1:group16803:245897:251356	Expressed_protein,_protein,_cDNA_clone:J013169H09,_full_insert_sequence	group16803	245897	251356	-	5A	94.846	TTGAAAGGTCCGTCATGCAC	PASS	AGAACGAGAACCGGAAACAT	PASS	1	118
known	5AL_4AL	TRIAE_CS42_4AL_TGACv1_288492_AA0950070.1:group3295:35327:36995	F-box_domain_containing_protein	group3295	35327	36995	-	4A	76.4952	AGAATATGTTTTAACACGGTACAGC	PASS	CCCCCTCTATCACACACAACC	PASS	1	89
known	7BS_4AL	TRIAE_CS42_4AL_TGACv1_288446_AA0948840.1:group6850:140646:145980	Alpha/beta-hydrolase_superfamily_protein,_Uncharacterized_protein	group6850	140646	145980	plus	4A	111.179	CGAGGCTTTTGTAAGAGCGAAC	PASS	CTCCCACCGCGCTTAAATG	PASS	1	69
novel	5AL_7BS	TRIAE_CS42_7BS_TGACv1_592267_AA1934680.2:group7391:27286:32606	Chloroplast_thylakoid_membrane,_putative_isoform_1	group7391	27286	32606	+	7B	1.13633	GTAGTACTCCACAACACACGG	PASS	TTTGTTGAGGAAGGAGGCCC	PASS	1	50

## Sheet: gDNA Qubit 
gDNA	Conc (ng/µl)	V for 30uL at 2ng/ul	H2O
N1A-T1D	3.8	15.7895	14.2105
N1D-T1A	4.04	14.8515	15.1485
N2A-T2D	9.38	6.39659	23.6034
N6D-T6A	5.78	10.3806	19.6194
N1B-T1A	4.18	14.3541	15.6459
N1D-T1B	10.4	5.76923	24.2308
N2D-T2A	3.44	17.4419	12.5581
N5D-T5A	16.3	3.68098	26.319
		V for 30uL at 2ng/ul	V for 180uL at 2ng/ul	H20
CS42	85.8	0.699301	4.1958	175.804
CS42 1:10

## Sheet: Primer-test
sample	transl	chr	fw	rev	fw len	rev len	fw + rev	insert_length	fragment_length	20160902_CS42	20160902_H2O	20160905_HS-TapeStation_size
1	4AL_5AL	5A	GTTGATGTAGTAGTGCCTCTGTTAT	TGGCCACGATAACCTCACAA	25	20	45	33	78	+?	PD	83
2	4AL_5AL	5A	GATGGAGATGATCACAGATGGATTA	ACGGAGACCTAAGGCAAAAGG	25	21	46	11	57	+	-
3	7BS_4AL	4A	ACAACCACGTTTGCTATTAGCT	TCACACCCTAAATACGCCCA	22	20	42	16	58	+	-
4	5BL_4BS	4B	GGATACCATGTGCAATGTACGTAG	GGATCGGAGAAAGGGAGTAGT	24	21	45	56	101	NS	-	117
5	7AL_3AL	3A	CGATAATGCTCGTATGCGGAATTAT	ACTCTCATATTCCCACCCACA	25	21	46	21	67	-	PD?
6	4AL_5AL	5A	TTGAAAGGTCCGTCATGCAC	AGAACGAGAACCGGAAACAT	20	20	40	78	118	NS	-	131?
7	5AL_4AL	4A	AGAATATGTTTTAACACGGTACAGC	CCCCCTCTATCACACACAACC	25	21	46	43	89	NS	PD	95
8	7BS_4AL	4A	CGAGGCTTTTGTAAGAGCGAAC	CTCCCACCGCGCTTAAATG	22	19	41	28	69	+	PD	75
9	5AL_7BS	7B	GTAGTACTCCACAACACACGG	TTTGTTGAGGAAGGAGGCCC	21	20	41	9	50	NS	PD	61?
										CS42	H20
									No. of +	3	0
									No. of +?	1	0
									No. of -	1	4
									No. of NS	4	0
									No. of PD	0	4
									No. of PD?	0	1
									Total	9	9

## Sheet: Test PCR
		18	18
	1x	x (with DNA)	x (without DNA)			95°C	03:00:00
Nuclease free water qsp 25uL	11.78	212.04	214.2			95°C	00:15:00	10 cycles
5X GC buffer (with MgCl2)	5	90	90			55°C	00:30:00
Betaine 5M (1M final)	5	90	90			72°C	00:10:00
dNTPs	0.5	9	9			95°C	00:15:00	20 cycles
Mix For+Rev primer 5uM each	2.5	-	-			50°C	00:30:00
CS42 DNA 10ng	0.12	2.16	-			72°C	00:10:00
Kapa 2G robust polymerase	0.1	1.8	1.8			72°C	01:00:00
	25					10°C	hold
	25
	1x	x (with DNA)	x (without DNA)
Nuclease free water qsp 25uL	16.78	302.04	304.2
5X GC buffer (with MgCl2)	5	90	90
dNTPs	0.5	9	9
Mix For+Rev primer 5uM each	2.5	-
CS42 DNA 10ng	0.12	2.16
Kapa 2G robust polymerase	0.1	1.8	1.8
	25
	25
	1x					95°C	03:00:00
Nuclease free water qsp 25uL	11.9					95°C	00:15:00	10 cycles ramp -1C/cycle until 50C
5X GC buffer (with MgCl2)	5					60°C	00:15:00
dNTPs	0.5					72°C	00:15:00
Mix For+Rev primer 5uM each	2.5					95°C	00:15:00	20 cycles
CS42 DNA 2ng/uL	5					50°C	00:15:00
Kapa 2G robust polymerase	0.1					72°C	00:15:00
						72°C	05:00:00
						10°C	hold
	1x	35
Nuclease free water qsp 25uL	9.875	345.625	21.725
5X GC buffer	5	175
MgCl2	2	70
dNTPs 10mM, freshly prepared	0.5	17.5
Forward primer 10uM	1.25
Reverse primer 10uM	1.25
DNA	5
HotStart GoTaq 5U/uL	0.125	4.375
	25uL

## Sheet: Exp PCR
							CS42 DNA (ng/uL)	85.8
		PPMM	SMM
	1x	6x (with DNA)	61x
Nuclease free water qsp 25uL	11.9	71.4	725.9			PP= Primer pair
5X GC buffer (with MgCl2)	5	30	305
dNTPs	0.5	3	30.5			PP1	PP2	PP3	PP4
Mix For+Rev primer 5uM each	2.5	15				PP5	PP6	PP7	PP8
DNA	5					PP9	PP10	PP11	PP12
Kapa 2G robust polymerase	0.1	0.6	6.1			PP13	PP14
	25
	25					PP16	PP17	PP18	PP19
						PP20	PP21	PP22	PP23
		105	1067.5			PP24	PP25	PP26	PP27
	20	120

## Sheet: Experiment2016-09-09
							touch-down PCR scores 09.09.2016
gDNA		Primer pair (PP)	transl	group	gDNA-dep	gDNA-arr	CS42 10ng	CS42 1ng	Nulli-dep 10ng	Nulli-arr 10ng	H20	option B when extra	Note
N1A-T1D		1	4AL_5AL	group17899	N4A-T4D	N5A-T5B	+	+	+	+	+
N1D-T1A		2	4AL_5AL	group17588	N4A-T4D	N5A-T5B	+	-	+	-	-
N2A-T2D		3	7BS_4AL	group1175	N7B-T7A	N4A-T4D	++	+	++	-	-
N6A-T6D		4	5BL_4BS	group17187	N5B-T5D	N4B-T4A	++	+	++	-	-		lower unspecific band
N7B-T7A		5	7AL_3AL	group12953	N7A-T7D	N3A-T3D	++?	++?	++?	++?	++?		contamination?
N1B-T1A		6	4AL_5AL	group16803	N4A-T4D	N5A-T5B	++	+	++	-	-		several extra bands
N1D-T1B		7	5AL_4AL	group3295	N5A-T5B	N4A-T4D	+	PD?	+	PD?	PD?		several extra bands
N2B-T2A		8	7BS_4AL	group6850	N7B-T7A	N4A-T4D	++	+	++	++	-
N5D-T5A		9	5AL_7BS	group7391	N5A-T5B	N7B-T7A	++	++	++	++	++
N7D-T7B

## Sheet: Experiment2016-09-19
					PCR scores 19.09.2016
Primer pair (PP)	transl	group	gDNA-dep	gDNA-arr	CS42 10ng	CS42 1ng	Nulli-dep 10ng	Nulli-arr 10ng	H20
1	4AL_5AL	group17899	N4A-T4D	N5A-T5B	++	+	++	-	-
2	4AL_5AL	group17588	N4A-T4D	N5A-T5B	++	+	++	-	-
3	7BS_4AL	group1175	N7B-T7A	N4A-T4D	++	+	++	-	-
4	5BL_4BS	group17187	N5B-T5D	N4B-T4A	+	-	+	-	-
5	7AL_3AL	group12953	N7A-T7D	N3A-T3D	+	?	-	+	-
6	4AL_5AL	group16803	N4A-T4D	N5A-T5B	++	+	++	?	-
7	5AL_4AL	group3295	N5A-T5B	N4A-T4D	++	+	++	+	-
8	7BS_4AL	group6850	N7B-T7A	N4A-T4D	++	+	++	++	-
9	5AL_7BS	group7391	N5A-T5B	N7B-T7A

## Sheet: ScoreTable2016-09-23
Primer pair (PP)	transl	group	chr	cM	fragment_length	gDNA-dep	gDNA-arr	PCR date	Annealing temperature	Gel number	CS42 10ng	CS42 1ng	Nulli-dep 10ng	Nulli-arr 10ng	H20	Translocation
1	4AL_5AL	group17899	5A	82.2857	78	N4A-T4D	N5A-T5B	19.09.2016	55	1	++	+	++	-	-	1
2	4AL_5AL	group17588	5A	94.846	57	N4A-T4D	N5A-T5B	19.09.2016	55	1	++	+	++	-	-	1
3	7BS_4AL	group1175	4A	111.179	58	N7B-T7A	N4A-T4D	19.09.2016	55	1	++	+	++	-	-	1
4	5BL_4BS	group17187	4B	50.376	101	N5B-T5D	N4B-T4A	20.09.2016	55	2	+	-	+	-	-	1
5	7AL_3AL	group12953	3A	70.7247	67	N7A-T7D	N3A-T3D	20.09.2016	55	2	++	+	-	+	-	0
6	5AL_4AL	group3295	4A	76.4952	89	N5A-T5B	N4A-T4D	21.09.2016	60	3	++	+	++	-	-	1
7	5AL_7BS	group7391	7B	1.13633	50	N5A-T5B	N7B-T7A	22.09.2016	60	3	+	-	+	-	-	1
8	4AL_5AL	group16803	5A	94.846	118	N4A-T4D	N5A-T5B	23.09.2019	60	4	++	+	++	-	-	1
9	7BS_4AL	group6850	4A	111.179	69	N7B-T7A	N4A-T4D	22.09.2016	60	4	+	-	++	? slightly higher band	-	?	maybe false, slightly higher band with Nulli-arr
																?	1
																0	1
																1	7
																TOTAL	9
																	0.777778
